# Supplementary material
Source: HighWire-hosted journal article supplement (https://ejhp.bmj.com/content/28/3/160)
Supplement: inline-supplementary-material-1 [file inline-supplementary-material-1.pdf]

**Supplementary Table. Major interactions between drugs**

| Patient code | First drug           | Second drug        |                                                                                                                       |
|--------------|----------------------|--------------------|-----------------------------------------------------------------------------------------------------------------------|
| 02           | Dabigatran           | Ranolazine         | Concurrent use may result in increased dabigatran exposure and increased risk of bleeding.                            |
| 03           | Escitalopram         | Trazodone          | Concurrent use may result in increased risk of serotonin syndrome and increased risk of QT-interval prolongation.     |
| 05           | Acetylsalicylic Acid | Dabigatran         | Concurrent use may result in increased risk of bleeding.                                                              |
| 05           | Amiodarone           | Dabigatran         | Concurrent use may result in increased dabigatran exposure and increased risk of bleeding.                            |
| 09           | Acetylsalicylic Acid | Repaglinide        | Concurrent use may result in increased risk of hypoglycemia.                                                          |
| 09           | Acetylsalicylic Acid | Furosemide         | Concurrent use may result in reduced diuretic effectiveness and possible nephrotoxicity.                              |
| 14           | Amlodipine           | Simvastatin        | Concurrent use may result in increased simvastatin exposure and increased risk of myopathy, including rhabdomyolysis. |
| 17           | Diclofenac           | Dabigatran         | Concurrent use may result in increased risk of bleeding.                                                              |
| 17           | Diclofenac           | Furosemide         | Concurrent use may result in reduced diuretic effectiveness and possible nephrotoxicity.                              |
| 17           | Ramipril             | Canrenone          | Concurrent use may result in hyperkalemia.                                                                            |
| 18           | Ketorolac            | Enoxaparin         | Concurrent use may result in an increased risk of bleeding.                                                           |
| 18           | Enalapril            | Ketorolac          | Concurrent use may result in renal dysfunction and/ or increased blood pressure.                                      |
| 18           | Ketorolac            | Furosemide         | Concurrent use may result in reduced diuretic effectiveness and possible nephrotoxicity.                              |
| 18           | Ketorolac            | Methylprednisolone | Concurrent use may result in increased risk of gastrointestinal ulcer or bleeding.                                    |
| 21           | Amitriptyline        | Tramadol           | Concurrent use may result in increased risk of paralytic ileus; increased risk of serotonin syndrome.                 |
| 21           | Amitriptyline        | Diclofenac         | Concurrent use may result in an increased risk of bleeding.                                                           |
| 21           | Amitriptyline        | Oxycodone          | Concurrent use may result in increased risk of serotonin syndrome.                                                    |
| 21           | Deflazacort          | Diclofenac         | Concurrent use may result in increased risk of gastrointestinal ulcer or bleeding.                                    |
| 21           | Diclofenac           | Enoxaparin         | Concurrent use may result in an increased risk of bleeding.                                                           |
| 21           | Oxycodone            | Tramadol           | Concurrent may result in increased risk of respiratory and CNS depression and increased risk of serotonin syndrome.   |
| 21           | Oxycodone            | Triazolam          | Concurrent use may result in increased risk of respiratory and CNS depression.                                        |
| 21           | Tramadol             | Triazolam          | Concurrent use may result in increased risk of respiratory and CNS depression.                                        |
| 21           | Diclofenac           | Olmesartan HCT     | Concurrent use may result in reduced diuretic effectiveness and possible nephrotoxicity.                              |
| 22           | Digoxin              | Carvedilol         | Concurrent use may result in increased digoxin concentrations;                                                        |

|    |                           |                    |                                                                                                               |
|----|---------------------------|--------------------|---------------------------------------------------------------------------------------------------------------|
|    |                           |                    | increased risk of complete heart block.                                                                       |
| 22 | Digoxin                   | Atorvastatin       | Concurrent use may result in increased plasma concentrations of digoxin.                                      |
| 23 | Atorvastatin              | Ranolazine         | Concurrent use may result in increased atorvastatin exposure and increased risk of myopathy.                  |
| 23 | Indapamide                | Acetylsalicyc Acid | Concurrent use may result in reduced diuretic effectiveness and possible nephrotoxicity.                      |
| 24 | Promazine                 | Mirtazapine        | Concurrent use may result in increased risk of cardiotoxicity and increased risk of QT-interval prolongation. |
| 25 | Leuprolide                | Flecainide         | Concurrent use may result in increased risk of QT-interval prolongation.                                      |
| 28 | Amlodipine                | Clopidogrel        | Concurrent use may result in decreased antiplatelet effect and increased risk of thrombotic events.           |
| 29 | Acetylsalicyc Acid        | Furosemide         | Concurrent use may result in reduced diuretic effectiveness and possible nephrotoxicity.                      |
| 32 | Acetylsalicyc Acid        | Clopidogrel        | Concurrent use may result in an increased risk of bleeding.                                                   |
| 32 | Acetylsalicyc Acid        | Furosemide         | Concurrent use may result in reduced diuretic effectiveness and possible nephrotoxicity.                      |
| 33 | Acetylsalicyc Acid        | Metformin          | Concurrent use may result in increased risk of hypoglycemia.                                                  |
| 36 | Digoxin                   | Manidipine         | Concurrent use may result in increased risk of complete heart block.                                          |
| 36 | Digoxin                   | Spirolactone       | Concurrent use may result in increased digoxin exposure.                                                      |
| 36 | Carvedilol                | Digoxin            | Concurrent use may result in increased digoxin concentrations; increased risk of heart block.                 |
| 36 | Omega 3 acid ethyl esters | Warfarin           | Concurrent use may result in increased risk of bleeding.                                                      |
| 42 | Hydrochlorothiazide       | Acetylsalicyc Acid | Concurrent use may result in reduced diuretic effectiveness and possible nephrotoxicity.                      |
| 42 | Acetylsalicyc Acid        | Metformin          | Concurrent use may result in increased risk of hypoglycemia.                                                  |
| 44 | Furosemide                | Ketorolac          | Concurrent use may result in reduced diuretic effectiveness and possible nephrotoxicity.                      |
| 44 | Amiodarone                | Clopidogrel        | Concurrent use may result in increased plasma concentrations of amiodarone.                                   |
| 44 | Ketorolac                 | Clopidogrel        | Concurrent use may result in increased risk of bleeding.                                                      |
| 44 | Ketorolac                 | Dexamethasone      | Concurrent use may result in increased risk of gastrointestinal ulcer or bleeding.                            |
| 45 | Acetylsalicyc Acid        | Furosemide         | Concurrent use may result in reduced diuretic effectiveness and possible nephrotoxicity.                      |
| 46 | Furosemide                | Levosulpiride      | Concurrent use may result in increased risk of QT prolongation.                                               |
| 46 | Theophylline              | Bisoprololo        | Concurrent use may result in an increased risk of bronchoconstriction.                                        |
| 49 | Citalopram                | Pantoprazole       | Concurrent may result in increased citalopram exposure and risk of QT interval prolongation.                  |

|    |                     |                    |                                                                                                                                |
|----|---------------------|--------------------|--------------------------------------------------------------------------------------------------------------------------------|
| 49 | Amiloride           | Acetylsalicyc Acid | Concurrent use may result in hyperkalemia, or possible nephrotoxicity.                                                         |
| 49 | Acetylsalicyc Acid  | Citalopram         | Concurrent use may result in an increased risk of bleeding.                                                                    |
| 49 | Hydrochlorothiazide | Acetylsalicyc Acid | Concurrent use may result in reduced diuretic effectiveness and possible nephrotoxicity.                                       |
| 50 | Escitalopram        | Ivabradine         | Concurrent use may result in increased risk of QT prolongation.                                                                |
| 50 | Escitalopram        | Formoterol         | Concurrent use may result in increased risk of QT-interval prolongation.                                                       |
| 50 | Ivabradine          | Formoterol         | Concurrent use may result in increased risk of QT prolongation.                                                                |
| 50 | Tiotropium          | Formoterol         | Concurrent use may result in increased risk of anticholinergic side effects .                                                  |
| 50 | Escitalopram        | Omeprazole         | Concurrent use may result in increased escitalopram exposure.                                                                  |
| 50 | Escitalopram        | Levofloxacin       | Concurrent use may result in increased risk of QT-interval prolongation.                                                       |
| 50 | Escitalopram        | Ranolazine         | Concurrent use may result in increased risk of QT-interval prolongation.                                                       |
| 50 | Escitalopram        | Acetylsalicyc Acid | Concurrent use may result in an increased risk of bleeding.                                                                    |
| 50 | Levofloxacin        | Ivabradine         | Concurrent use may result in increased risk of QT prolongation.                                                                |
| 50 | Levofloxacin        | Formoterol         | Concurrent use may result in increased risk of QT interval prolongation.                                                       |
| 50 | Ranolazine          | Ivabradine         | Concurrent use may result in increased risk of QT prolongation.                                                                |
| 50 | Acetylsalicyc Acid  | Furosemide         | Concurrent use may result in reduced diuretic effectiveness and possible nephrotoxicity.                                       |
| 50 | Ranolazine          | Levofloxacin       | Concurrent use may result in increased risk of QT interval prolongation.                                                       |
| 51 | Amlodipine          | Clopidogrel        | Concurrent use may result in decreased antiplatelet effect and increased risk of thrombotic events.                            |
| 53 | Lisinopril          | Acetylsalicyc Acid | Concurrent use may result in decreased lisinopril effectiveness.                                                               |
| 53 | Ketoprofen          | Acetylsalicyc Acid | Concurrent use may result in increased risk of bleeding and increased risk of cardiovascular events.                           |
| 53 | Ketoprofen          | Lisinopril         | Concurrent use may result in renal dysfunction and/ or increased blood pressure.                                               |
| 53 | Ketoprofen          | Methylprednisolone | Concurrent use may result in increased risk of gastrointestinal ulcer or bleeding.                                             |
| 53 | Acetylsalicyc Acid  | Methylprednisolone | Concurrent use may result in an increased risk of gastrointestinal ulceration and subtherapeutic aspirin serum concentrations. |
| 55 | Acetylsalicyc Acid  | Repaglinide        | Concurrent use may result in increased risk of hypoglycemia.                                                                   |
| 60 | Simvastatin         | Amlodipine         | Concurrent use may result in increased simvastatin exposure and increased risk of myopathy, including rhabdomyolysis.          |
| 60 | Simvastatin         | Ranolazine         | Concurrent use may result in increased simvastatin exposure and increased risk of rhabdomyolysis.                              |

|    |                      |                      |                                                                                                                              |
|----|----------------------|----------------------|------------------------------------------------------------------------------------------------------------------------------|
| 60 | Metformin            | Ranolazine           | Concurrent use may result in increased metformin exposure.                                                                   |
| 60 | Metformin            | Acetylsalicylic Acid | Concurrent use may result in increased risk of hypoglycemia.                                                                 |
| 61 | Amlodipine           | Simvastatin          | Concurrent use may result in increased simvastatin exposure and increased risk of myopathy, including rhabdomyolysis.        |
| 61 | Acetylsalicylic Acid | Ketoprofen           | Concurrent use may result in increased risk of bleeding and cardiovascular events.                                           |
| 61 | Azathioprine         | Ramipril             | Concurrent use may result in myelosuppression.                                                                               |
| 61 | Prednisone           | Acetylsalicylic Acid | Concurrent use may result in increased risk of gastrointestinal ulcer or bleeding.                                           |
| 62 | Lamotrigine          | Carbamazepine        | Concurrent use may result in reduced lamotrigine efficacy.                                                                   |
| 62 | Digoxin              | Telmisartan          | Concurrent use may result in an increased risk of digoxin toxicity (nausea, vomiting, arrhythmias).                          |
| 62 | Digoxin              | Amiodarone           | Concurrent use may result in digoxin toxicity (nausea, vomiting, cardiac arrhythmias) and potentiated effects of amiodarone. |
| 62 | Amiodarone           | Carbamazepine        | Concurrent use may result in decreased efficacy of amiodarone.                                                               |
| 62 | Digoxin              | Acetylsalicylic Acid | Concurrent use may result in increased serum concentration and prolonged half-life of digoxin.                               |
| 62 | Lamotrigine          | Phenobarbital        | Concurrent use may result in reduced lamotrigine efficacy.                                                                   |
| 63 | Promazine            | Quetiapine           | Concurrent use may result in increased risk of QT prolongation.                                                              |
| 63 | Promazine            | Alfuzosin            | Concurrent use may result in increased risk of QT prolongation.                                                              |
| 63 | Quetiapine           | Alfuzosin            | Concurrent use may result in increased risk of QT-interval prolongation.                                                     |
| 66 | Canrenone            | Ramipril             | Concurrent use may result in hyperkalemia.                                                                                   |
| 68 | Etoricoxib           | Fosinopril           | Concurrent use may result in renal dysfunction and/ or increased blood pressure.                                             |
| 68 | Etoricoxib           | Duloxetine           | Concurrent use may result in an increased risk of bleeding.                                                                  |
| 70 | Acetylsalicylic Acid | Ticagrelor           | Concurrent use may result in an increased risk of bleeding and decreased ticagrelor efficacy with higher doses of aspirin.   |
| 70 | Acetylsalicylic Acid | Olmesartan HCT       | Concurrent use may result in reduced diuretic effectiveness and possible nephrotoxicity.                                     |
| 77 | Clopidogrel          | Repaglinide          | Concurrent use may result in increased repaglinide exposure.                                                                 |
| 77 | Acetylsalicylic Acid | Furosemide           | Concurrent use may result in reduced diuretic effectiveness and possible nephrotoxicity.                                     |
| 77 | Acetylsalicylic Acid | Repaglinide          | Concurrent use may result in increased risk of hypoglycemia.                                                                 |
| 77 | Acetylsalicylic Acid | Clopidogrel          | Concurrent use of ASPIRIN and CLOPIDOGREL may result in an increased risk of bleeding.                                       |
| 80 | Spironolactone       | Ramipril             | Concurrent use may result in hyperkalemia.                                                                                   |
| 83 | Acetylsalicylic Acid | Ticagrelor           | Concurrent use may result in an increased risk of bleeding and decreased ticagrelor efficacy with higher doses of aspirin.   |
| 83 | Acetylsalicylic Acid | Furosemide           | Concurrent use may result in reduced diuretic effectiveness and possible nephrotoxicity.                                     |

|           |                      |                      |                                                                                                                                 |
|-----------|----------------------|----------------------|---------------------------------------------------------------------------------------------------------------------------------|
| <b>85</b> | Furosemide           | Digoxin              | Concurrent use may result in increased risk of digoxin toxicity (nausea, vomiting, cardiac arrhythmias).                        |
| <b>89</b> | Sertraline           | Selegiline           | Concurrent use may result in CNS toxicity or serotonin syndrome (hypertension, hyperthermia, myoclonus, mental status changes). |
| <b>89</b> | Sertraline           | Acetylsalicylic Acid | Concurrent use may result in an increased risk of bleeding.                                                                     |
| <b>89</b> | Selegilina           | Levodopa             | Concurrent use may result in increased risk of levodopa adverse effects, including severe orthostatic hypotension.              |
| <b>90</b> | Acetylsalicylic Acid | Furosemide           | Concurrent use may result in reduced diuretic effectiveness and possible nephrotoxicity.                                        |
| <b>90</b> | Acetylsalicylic Acid | Clopidogrel          | Concurrent use may result in an increased risk of bleeding.                                                                     |
| <b>98</b> | Valsartan            | Spirolactone         | Concurrent use may result in increased risk of hyperkalemia and serum creatinine elevation in heart failure patients .          |

To avoid identification of the patients, in the table there is only patient's code
